# Supplementary material for: Silver nanowires intercalating Ti3C2Tx MXene composite films with excellent flexibility for electromagnetic interference shielding
Source: Royal Society of Chemistry journal article supplement (doi:10.1039/c9tc06361g), 2020-01-01
Supplement: c9tc06361g1.pdf [file c9tc06361g1.pdf]

## Supporting information

### Silver nanowires intercalating $\text{Ti}_3\text{C}_2\text{T}_x$ MXene composite films with excellent flexibility for electromagnetic interference shielding

Miao Miao<sup>a</sup>, Ruiting Liu<sup>b</sup>, Sineenat Thaiboonrod<sup>c</sup>, Liyi Shi<sup>a</sup>, Shaomei Cao<sup>a</sup>, Jianfeng Zhang<sup>b</sup>, Jianhui Fang<sup>a</sup>, Xin Feng<sup>a\*</sup>

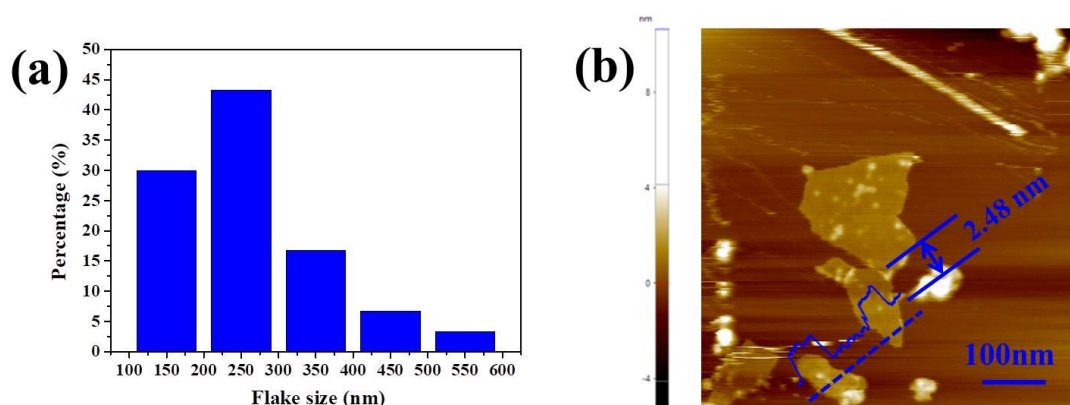

Fig. S1 Size dispersion (a) and AFM image (b) of  $\text{Ti}_3\text{C}_2\text{T}_x$  sheets. Size dispersion was calculated from TEM image.

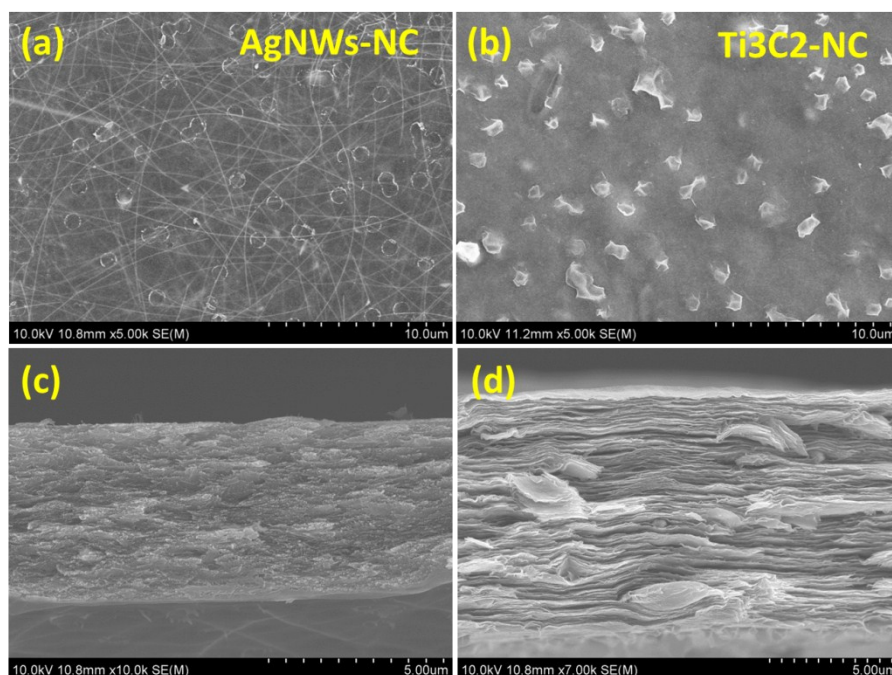

Fig. S2 Surface and cross-sectional SEM images of AgNWs-NC (a,c) and  $\text{Ti}_3\text{C}_2$ -NC (b,d) hybrid films, respectively.

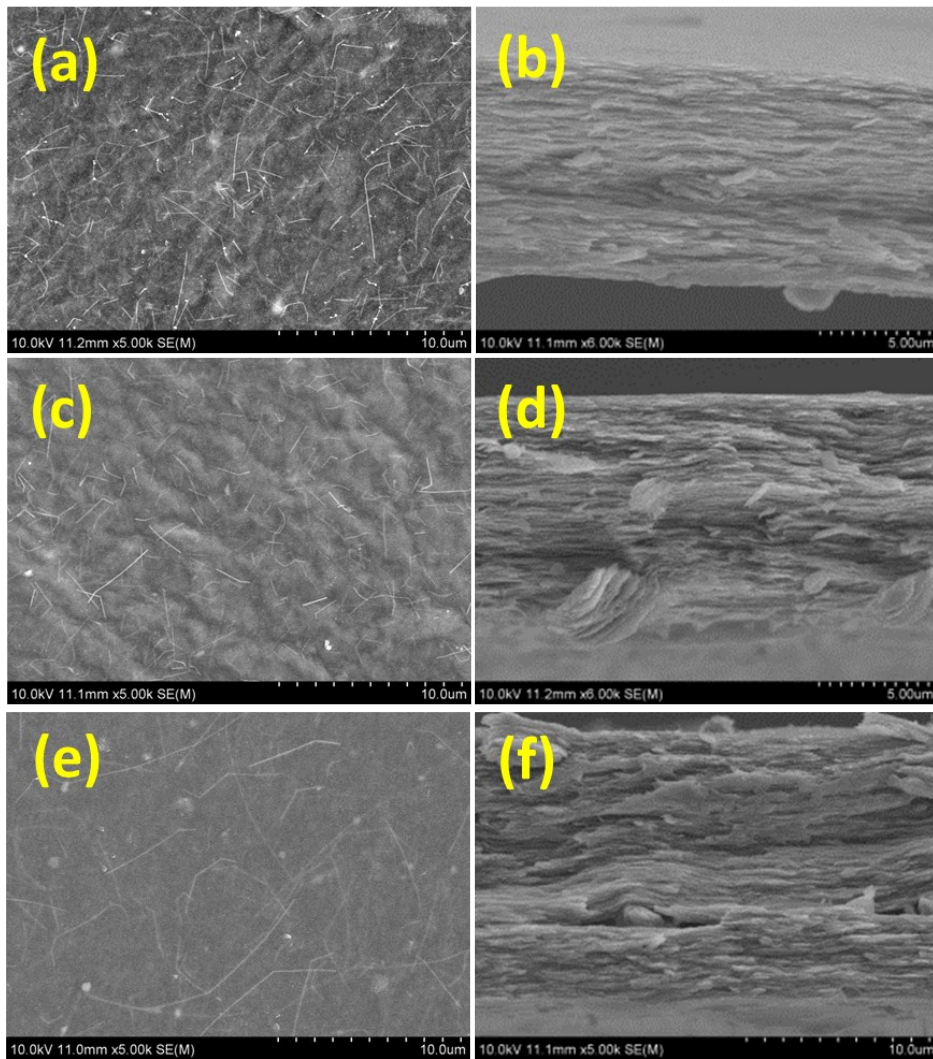

Fig. S3 SEM images of top surfaces and fracture surfaces for (a, b) TN0.125A, (c, d) TN0.25A and (e, f) TN0.5A.

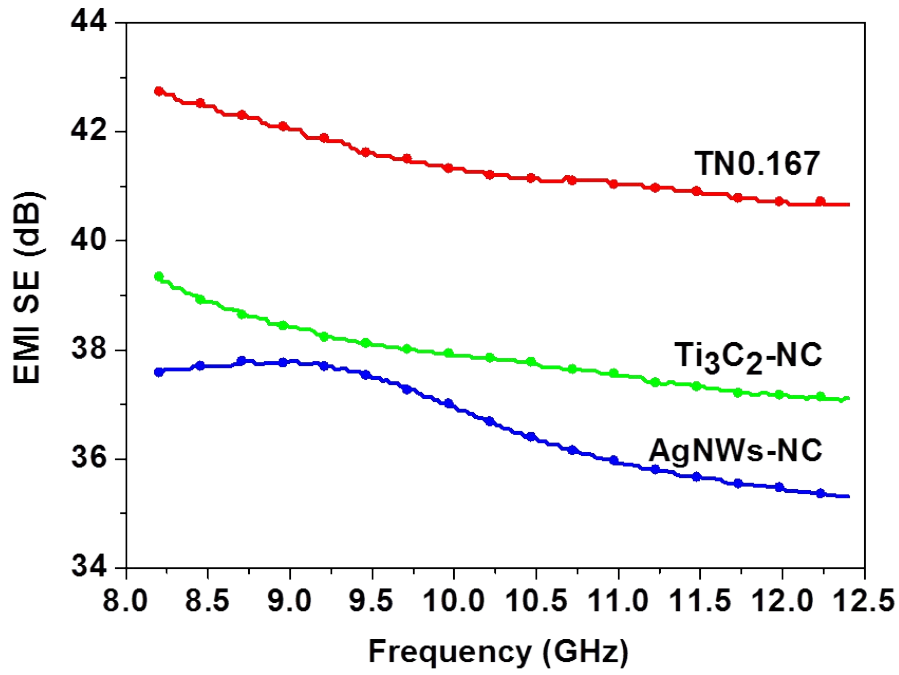

Fig. S4 EMI SE of TN0.167A, Ti<sub>3</sub>C<sub>2</sub>-NC and AgNWs-NC hybrid films in the frequency range of 8.2-12.4 GHz.

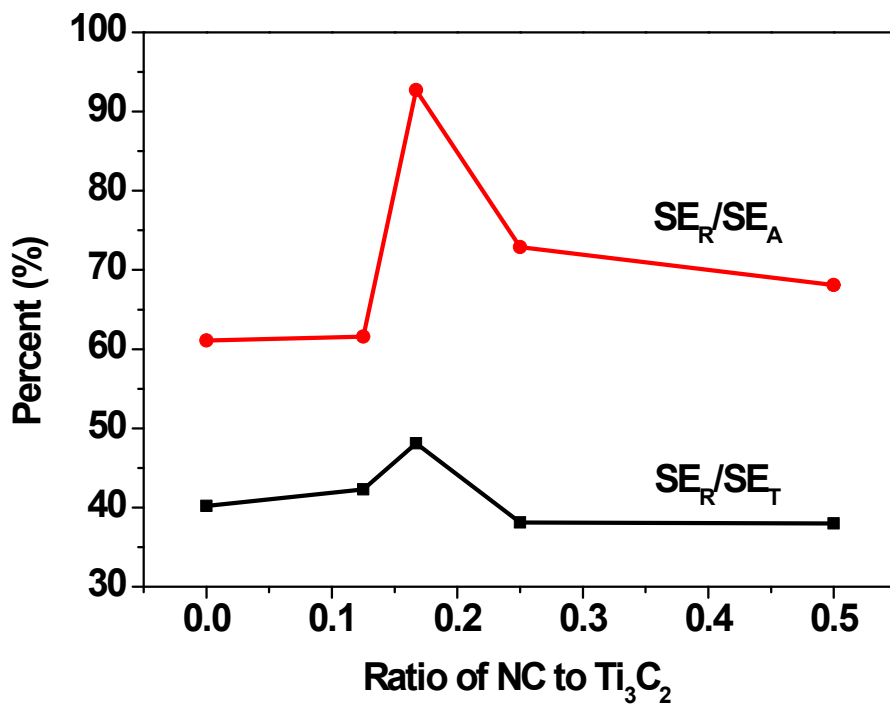

Fig. S5 SE<sub>R</sub>/SE<sub>A</sub> and SE<sub>R</sub>/SE<sub>T</sub> values of pure Ti<sub>3</sub>C<sub>2</sub> and hybrid films as the ratio of NC-to-Ti<sub>3</sub>C<sub>2</sub>.

Table S1 Comparison of EMI shielding performance for various materials

| Sample | Materials                                                 | Content (wt%) | Matrix               | Thickness (cm) | Density ( $\text{g}\cdot\text{cm}^{-3}$ ) | EMI SE (dB)  | SSE ( $\text{cm}^2\cdot\text{g}^{-1}$ ) | SSE/t ( $\text{cm}^2\cdot\text{g}^{-1}$ ) | Ref.             |
|--------|-----------------------------------------------------------|---------------|----------------------|----------------|-------------------------------------------|--------------|-----------------------------------------|-------------------------------------------|------------------|
| 1      | Ni fiber/PES                                              | 7*            | PES                  | 0.285          | 1.87                                      | 58           | 31                                      | 108.7                                     | <sup>1</sup>     |
| 2      | Ni filaments/PES                                          | 7*            | PES                  | 0.285          | 1.85                                      | 87           | 47                                      | 164.9                                     | <sup>1</sup>     |
| 3      | copper                                                    | Bulk          | /                    | 0.31           | 9                                         | 90           | 10                                      | 32.3                                      | <sup>1</sup>     |
| 4      | CuNi-CNT foam                                             | Bulk          | /                    | 0.15           | 0.23                                      | 54.6         | 237                                     | 1580                                      | <sup>2</sup>     |
| 5      | SWCNT/PS                                                  | 7             | PS                   | 0.12           | 0.56                                      | 18.5         | 33                                      | 275                                       | <sup>3</sup>     |
| 6      | MWCNT/WPU                                                 | 76.2          | WPU                  | 0.1            | 0.039                                     | 21.1         | 541                                     | 5410                                      | <sup>4</sup>     |
| 7      | CNT sponge                                                | Bulk          | /                    | 0.238          | 0.02                                      | 22           | 1100                                    | 4622                                      | <sup>5</sup>     |
| 8      | CNT/Epoxy                                                 | 0.66          | Epoxy                | 0.2            | 0.975                                     | 33           | 33.84                                   | 169.2                                     | <sup>6</sup>     |
| 9      | CNT/Cellulose                                             | 40            | cellulose            | 0.015          | 1.7                                       | 35           | 20.586                                  | 1372.4                                    | <sup>7</sup>     |
| 10     | RGO foam                                                  | Bulk          | /                    | 0.03           | 0.06                                      | 25.2         | 420                                     | 14000                                     | <sup>8</sup>     |
| 11     | Graphene paper                                            | Bulk          | /                    | 0.005          | 0.81                                      | 62           | 76.5                                    | 15309                                     | <sup>9</sup>     |
| 12     | Fe <sub>3</sub> O <sub>4</sub> /Graphene paper            | Bulk          | /                    | 0.03           | 0.78                                      | 24           | 30.76                                   | 1025                                      | <sup>10</sup>    |
| 13     | Graphene/PDMS foam                                        | 0.8           | PDMS                 | 0.1            | 0.06                                      | 19.98        | 333                                     | 3330                                      | <sup>11</sup>    |
| 14     | Graphene foam/PEDOT:PSS                                   | 40            | PEDOT:PSS            | 0.15           | 0.0198                                    | 69.1         | 3124                                    | 20827                                     | <sup>12</sup>    |
| 15     | CNT/graphene foam                                         | Bulk          | /                    | 0.16           | 0.0058                                    | 38.4         | 6620                                    | 41375                                     | <sup>13</sup>    |
| 16     | Ti <sub>3</sub> C <sub>2</sub> foam                       | Bulk          | /                    | 0.006          | 0.22                                      | 70           | 318                                     | 53030                                     | <sup>14</sup>    |
| 17     | Ti <sub>3</sub> C <sub>2</sub> /SA                        | 90            | SA                   | 0.0008         | 2.317                                     | 57           | 24.6                                    | 30830                                     | <sup>15</sup>    |
| 18     | Ti <sub>3</sub> C <sub>2</sub>                            | Bulk          | /                    | 0.0011         | 2.394                                     | 68           | 28.4                                    | 25863                                     | <sup>15</sup>    |
| 19     | Ti <sub>3</sub> C <sub>2</sub> /CNF                       | 90            | cellulose            | 0.0047         | 2                                         | 24           | 12                                      | 2647                                      | <sup>16</sup>    |
| 20     | Ti <sub>3</sub> C <sub>2</sub> T <sub>x</sub> /TOCNF      | 50            | cellulose            | 0.0047         | 1.46                                      | 32.7         | 22.4                                    | 4761                                      | <sup>17</sup>    |
| 21     | CNF@MXene                                                 | 50            | cellulose            | 0.0035         | /                                         | 40           | /                                       | 7029                                      | <sup>18</sup>    |
| 22     | d-Ti <sub>3</sub> C <sub>2</sub> T <sub>x</sub> /ANF      | 60            | Aramid Nanofibe      | 0.0017         | 1.255                                     | 28.54        | 22.74                                   | 13377                                     | <sup>19</sup>    |
| 23     | MXene-GO                                                  | 50            | GO                   | 0.0007         | /                                         | 50.17        | /                                       | /                                         | <sup>20</sup>    |
| 24     | Ti <sub>3</sub> C <sub>2</sub> T <sub>x</sub> / PEDOT:PSS | 87.5          | PEDOT:PSS            | 0.0011         | 1.94                                      | 42.1         | 21.7                                    | 19497.8                                   | <sup>21</sup>    |
| 25     | <b>MXene film</b>                                         | <b>Bulk</b>   | <b>/</b>             | <b>0.0009</b>  | <b>2.165</b>                              | <b>42.78</b> | <b>19.76</b>                            | <b>21953</b>                              | <b>This work</b> |
| 26     | <b>MXene/AgNW film</b>                                    | <b>86</b>     | <b>Nanocellulose</b> | <b>0.0017</b>  | <b>1.5</b>                                | <b>42.74</b> | <b>28.49</b>                            | <b>16724</b>                              |                  |

1. X. P. Shui and D. D. L. Chung, *Journal Of Electronic Materials*, 1997, **26**, 928-934.
2. K. Ji, H. Zhao, J. Zhang, J. Chen and Z. Dai, *Applied Surface Science*, 2014, **311**, 351-356.
3. Y. L. Yang and M. C. Gupta, *Nano Letters*, 2005, **5**, 2131-2134.
4. Z. Zeng, H. Jin, M. Chen, W. Li, L. Zhou and Z. Zhang, *Advanced Functional Materials*, 2016, **26**, 303-310.
5. M. Crespo, M. Gonzalez, A. L. Elias, L. P. Rajukumar, J. Baselga, M. Terrones and J. Pozuelo, *Physica Status Solidi-Rapid Research Letters*, 2014, **8**, 698-704.
6. Y. Chen, H.-B. Zhang, Y. Yang, M. Wang, A. Cao and Z.-Z. Yu, *Advanced Functional Materials*, 2016, **26**, 447-455.
7. L.-Q. Zhang, B. Yang, J. Teng, J. Lei, D.-X. Yan, G.-J. Zhong and Z.-M. Li, *Journal of Materials Chemistry C*, 2017, **5**, 3130-3138.
8. B. Shen, Y. Li, D. Yi, W. Zhai, X. Wei and W. Zheng, *Carbon*, 2016, **102**, 154-160.
9. L. Zhang, N. T. Alvarez, M. X. Zhang, M. Haase, R. Malik, D. Mast and V. Shanov, *Carbon*, 2015, **82**, 353-359.
10. W. L. Song, X. T. Guan, L. Z. Fan, W. Q. Cao, C. Y. Wang, Q. L. Zhao and M. S. Cao, *Journal Of Materials Chemistry A*, 2015, **3**, 2097-2107.
11. Z. Chen, C. Xu, C. Ma, W. Ren and H.-M. Cheng, *Advanced Materials*, 2013, **25**, 1296-1300.
12. Y. Wu, Z. Wang, X. Liu, X. Shen, Q. Zheng, Q. Xue and J.-K. Kim, *Acs Applied Materials & Interfaces*, 2017, **9**, 9059-9069.
13. Q. Song, F. Ye, X. Yin, W. Li, H. Li, Y. Liu, K. Li, K. Xie, X. Li, Q. Fu, L. Cheng, L. Zhang and B. Wei, *Advanced Materials*, 2017, **29**.
14. J. Liu, H.-B. Zhang, R. Sun, Y. Liu, Z. Liu, A. Zhou and Z.-Z. Yu, *Advanced Materials*, 2017, **29**, 1702367.
15. F. Shahzad, M. Alhabeb, C. B. Hatter, B. Anasori, S. M. Hong, C. M. Koo and Y. Gogotsi, *Science*, 2016, **353**, 1137-1140.
16. W. T. Cao, F. F. Chen, Y. J. Zhu, Y. G. Zhang, Y. Y. Jiang, M. G. Ma and F. Chen, *ACS Nano*, 2018, **12**, 4583-4593.
17. Z. Zhan, Q. Song, Z. Zhou and C. Lu, *Journal of Materials Chemistry C*, 2019, **7**, 9820-9829.
18. B. Zhou, Z. Zhang, Y. Li, G. Han, Y. Feng, B. Wang, D. Zhang, J. Ma and C. Liu, *ACS Appl Mater Interfaces*, 2020, DOI: 10.1021/acsami.9b19768.
19. F. Xie, F. Jia, L. Zhuo, Z. Lu, L. Si, J. Huang, M. Zhang and Q. Ma, *Nanoscale*, 2019, **11**, 23382-23391.
20. J. Liu, Z. Liu, H. B. Zhang, W. Chen, Z. Zhao, Q. W. Wang and Z. Z. Yu, *Advanced Electronic Materials*, 2019, DOI: 10.1002/aelm.201901094.
21. R. Liu, M. Miao, Y. Li, J. Zhang, S. Cao and X. Feng, *ACS Appl Mater Interfaces*, 2018, **10**, 44787-44795.
